# Supplementary material for: Optically Transparent and Toughened Poly(methyl methacrylate) Composite Films with Acylated Cellulose Nanofibers
Source: PubMed Central journal article supplement — ACS Omega. 2021 Apr 13;6(16):10752–8. doi: 10.1021/acsomega.1c00325 (PMC8153788; doi:10.1021/acsomega.1c00325), 2021-04-13
Supplement: ao1c00325_si_001.pdf [file ao1c00325_si_001.pdf]

## SUPPORTING INFORMATION

### Optically transparent and toughened Poly(methyl methacrylate) Composite Films with Acylated Cellulose Nanofiber

Naharullah Jamaluddin<sup>a</sup>, Yu-I Hsu<sup>a</sup>, \* Taka-Aki Asoh<sup>a</sup>, and Hiroshi Uyama<sup>a\*</sup>

<sup>a</sup>Department of Applied Chemistry, Graduate School of Engineering, Osaka University,  
2-1 Yamadaoka, Suita, Osaka 565-0871, Japan. Tel.: +81-6-6879-7364 Fax: +81-6-  
6879-7367

[naharullah@chem.eng.osaka-u.ac.jp](mailto:naharullah@chem.eng.osaka-u.ac.jp)

\* [yuihsu@chem.eng.osaka-u.ac.jp](mailto:yuihsu@chem.eng.osaka-u.ac.jp)

[asoh@chem.eng.osaka-u.ac.jp](mailto:asoh@chem.eng.osaka-u.ac.jp)

\* [uyama@chem.eng.osaka-u.ac.jp](mailto:uyama@chem.eng.osaka-u.ac.jp)

**Equation S1.** Derivation of equations from EDX analysis.

**Figure S1.** Chemical equation of acylation process of CNF into CNFp.

**Figure S2.** ATR-IR spectra of (a) CNF, (b) CNFp (1 hour), (c) CNFp (2 hours), and (d) CNFp (4 hours).

**Figure S3.** Stress-strain curve from tensile test of PMMA composite films.

**Equation S1.** Derivation of equations from EDX analysis.

Assume 100% glucose units of CNF are modified into CNFp,

$$\text{CNFp} = \text{C}_{15}\text{H}_{22}\text{O}_8 \text{ (Mw} = 330 \text{ gmol}^{-1}\text{)}$$

Mass percentage (excluding H), C = 58.4%, O = 41.6%

*A* = Percent of CNF propionate (CNFp)

$$B = \text{Ratio of C:O} = \frac{C}{O}$$

$$B = \frac{C}{O} = \frac{\text{Mw of single C} [\text{No of C propionate (A)} + \text{No of C in CNF (100\% - A)}]}{\text{Mw of single O} [\text{No of O propionate (A)} + \text{No of O in CNF (100\% - A)}]}$$

$$B = \frac{C}{O} = \frac{12[15(A) + 6(100\% - A)]}{16[8(A) + 5(100\% - A)]}$$

Simplify A,

$$A = \frac{200(10B - 9)}{3(9 - 4B)} \text{ (Equation 1)}$$

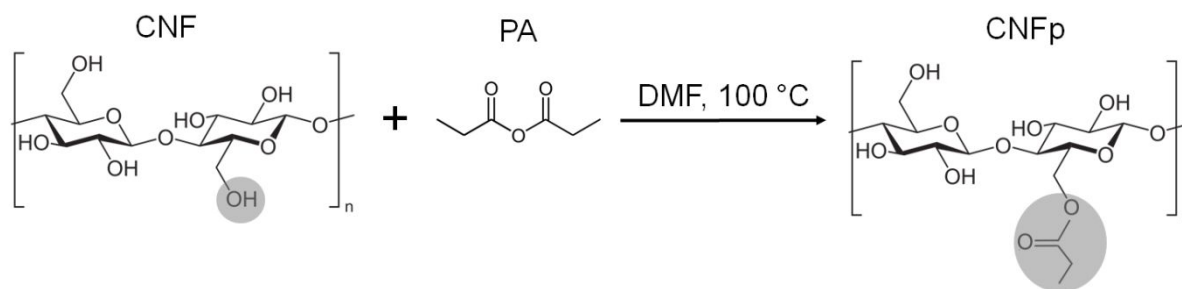

**Figure S1.** Chemical equation of acylation process of CNF into CNFp.

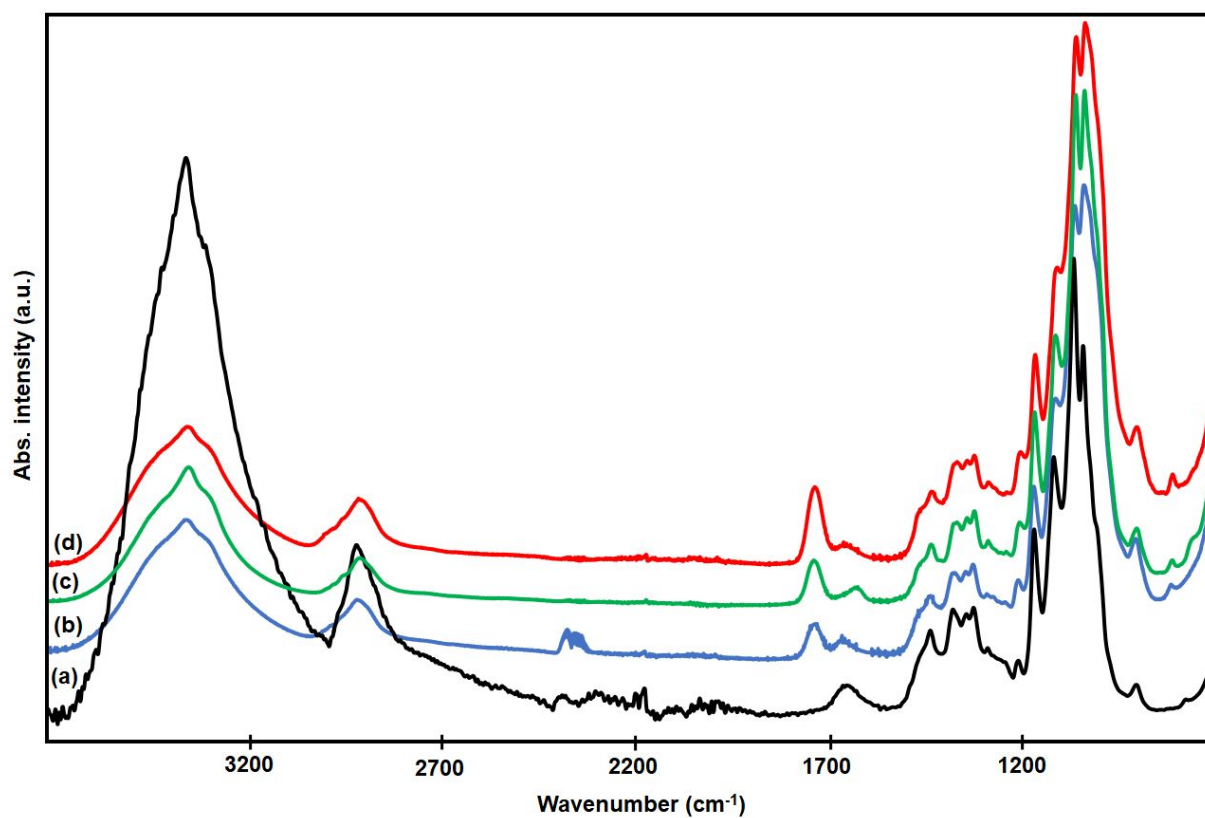

**Figure S2.** ATR-IR spectra of (a) CNF, (b) CNFp (1 hour), (c) CNFp (2 hours), and (d) CNFp (4 hours).

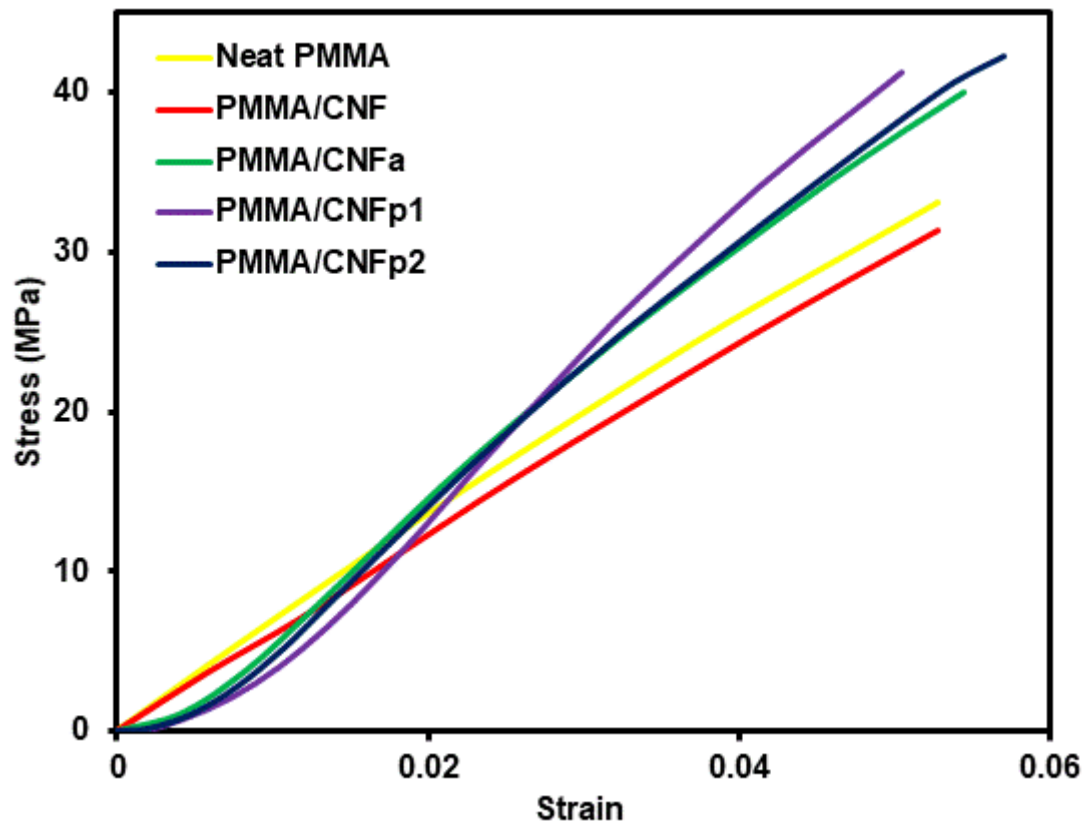

**Figure S3.** Stress-strain curves from tensile test of PMMA composite films.
